# Supplementary material for: Cat and Dog Ownership in Early Life and Infant Development: A Prospective Birth Cohort Study of Japan Environment and Children’s Study
Source: MDPI journal article supplement (doi:10.3390/ijerph17010205), 2019-12-27
Supplement: s1 [file s1]

Supplemental Table 1 Comparison between the current study population and those who excluded from the current study due to no data of pet ownership

|                                                      |             | Mean $\pm$ SD or n (%)   |                  | p-value |
|------------------------------------------------------|-------------|--------------------------|------------------|---------|
| Parents                                              |             | Current study (n=78,868) | Excluded (n=860) |         |
| Maternal age at delivery (years)                     |             | 30.7 $\pm$ 5.1           | 30.8 $\pm$ 5.2   | 0.645   |
| Parity                                               | nulliparous | 31,078 (39.4)            | 336 (39.1)       | 0.844   |
|                                                      | multipara   | 32,986 (41.8)            | 503 (74.0)       |         |
|                                                      | missing     | 1,908 (2.4)              | 21 (2.4)         |         |
| Maternal smoking at 2 <sup>nd</sup> trimester        | yes         | 2,874 (3.6)              | 93 (10.8)        | < 0.001 |
|                                                      | no          | 75,051 (95.2)            | 711 (82.7)       |         |
|                                                      | missing     | 943 (1.2)                | 56 (6.5)         |         |
| Maternal drinking at 2 <sup>nd</sup> trimester       | yes         | 2,134 (2.7)              | 29 (3.4)         | 0.139   |
|                                                      | no          | 75,789 (96.1)            | 778 (90.5)       |         |
|                                                      | missing     | 945 (1.2)                | 53 (6.2)         |         |
| Maternal education                                   | < 13        | 26,859 (34.1)            | 413 (48.0)       | < 0.001 |
|                                                      | $\geq$ 13   | 51,249 (65.0)            | 400 (45.5)       |         |
|                                                      | missing     | 760 (1.0)                | 47 (5.5)         |         |
| Paternal education                                   | < 13        | 33,115 (42.0)            | 467 (54.3)       | < 0.001 |
|                                                      | $\geq$ 13   | 44,570 (56.5)            | 342 (39.8)       |         |
|                                                      | missing     | 1,183 (1.5)              | 51 (5.9)         |         |
| Annual household income at 2 <sup>nd</sup> trimester | < 4         | 28,699 (36.4)            | 386 (44.9)       | < 0.001 |
|                                                      | $\geq$ 4    | 44,361 (56.2)            | 351 (40.8)       |         |
|                                                      | missing     | 5,808 (7.4)              | 123 (14.3)       |         |
| <b>Infant</b>                                        |             |                          |                  |         |
| Sex                                                  | male        | 40,274 (51.1)            | 442 (51.4)       | 0.854   |
|                                                      | female      | 38,572 (48.9)            | 418 (48.6)       |         |
|                                                      | missing     | 22 (0.0)                 | 0 (0.0)          |         |
| Birth weight (g)                                     |             | 3041 $\pm$ 384           | 3021 $\pm$ 426   | 0.169   |
| Gestational age (weeks)                              |             | 39.4 $\pm$ 1.2           | 39.2 $\pm$ 1.5   | < 0.001 |
| Delivery mode                                        | vaginal     | 64,007 (81.2)            | 680 (79.1)       | 0.133   |
|                                                      | cesarean    | 14,665 (18.6)            | 177 (20.6)       |         |
|                                                      | missing     | 196 (0.2)                | 3 (0.3)          |         |
| Duration of breast feeding (months)                  | 0           | 1,978 (2.5)              | 50 (5.8)         | < 0.001 |
|                                                      | 1-6         | 16,582 (21.0)            | 304 (35.3)       |         |

|                            |      |               |            |
|----------------------------|------|---------------|------------|
|                            | 7-12 | 60,308 (76.5) | 506 (58.8) |
| Chi-square test or t-test. |      |               |            |

Supplemental Table 2 Comparison of ASQ-3 scores between the current study population and those who excluded from the current study due to no data of pet ownership

| ASQ subscale    | Cutoff | Mean $\pm$ SD                   |                  | p-value |
|-----------------|--------|---------------------------------|------------------|---------|
|                 |        | Current study (n=78,868)        | Excluded (n=860) |         |
| Communication   | 15.64  | Mean $\pm$ SD 37.68 $\pm$ 13.43 | 40.9 $\pm$ 13.2  | < 0.001 |
| Gross motor     | 21.49  | Mean $\pm$ SD 42.78 $\pm$ 17.55 | 44.5 $\pm$ 16.9  | 0.004   |
| Fine motor      | 34.50  | Mean $\pm$ SD 48.21 $\pm$ 11.63 | 48.9 $\pm$ 11.6  | 0.091   |
| Problem-solving | 27.32  | Mean $\pm$ SD 42.35 $\pm$ 13.61 | 44.3 $\pm$ 13.5  | < 0.001 |
| Personal-social | 21.73  | Mean $\pm$ SD 37.03 $\pm$ 14.57 | 39.9 $\pm$ 14.4  | < 0.001 |

t-test.

Supplemental Table 3 Infant development delays at 12 months of age in association with cat and dog ownership at 6 months of age

|                 | OR (95% CI)                    |                     |                                |
|-----------------|--------------------------------|---------------------|--------------------------------|
|                 | Only cat ownership             | Only dog ownership  | Both cat and dog ownership     |
| Communication   | 1.14 (1.02, 1.28)*             | 0.75 (0.68, 0.83)** | 0.65 (0.51, 0.83)*             |
| Gross motor     | 0.93 (0.85, 1.02)              | 0.85 (0.79, 0.91)** | 0.91 (0.78, 1.06)              |
| Fine motor      | 0.93 (0.84, 1.03)              | 0.83 (0.77, 0.90)** | 0.86 (0.72, 1.03) <sup>+</sup> |
| Problem solving | 1.02 (0.94, 1.11)              | 0.92 (0.86, 0.98)*  | 0.83 (0.71, 0.96)*             |
| Personal-social | 0.96 (0.88, 1.04) <sup>+</sup> | 0.84 (0.79, 0.89)** | 0.79 (0.69, 0.92)*             |

Adjusted for maternal and paternal education, maternal smoke during pregnancy, annual household income during pregnancy, maternal mental illness (K6), duration of breast feeding.

<sup>+</sup> p < 0.10, \* p < 0.05, \*\* p < 0.001
